# Supplementary material for: Control of the stereo-selectivity of styrene epoxidation by cytochrome P450 BM3 using structure-based mutagenesis
Source: Royal Society of Chemistry journal article supplement (doi:10.1039/c0mt00082e), 2011-01-01
Supplement: c0mt00082e.pdf [file c0mt00082e.pdf]

# Control of the stereo-selectivity of styrene epoxidation by cytochrome P450 BM3 using structure-based mutagenesis

Wei-Cheng Huang<sup>a</sup>, Paul M. Cullis<sup>b</sup>, Emma Lloyd Raven<sup>b</sup>, and Gordon C.K. Roberts<sup>a\*</sup>

Received (in XXX, XXX) Xth XXXXXXXXX 200X, Accepted Xth XXXXXXXXX 200X

<sup>5</sup> First published on the web Xth XXXXXXXXX 200X

DOI: 10.1039/b000000x

## Supplemental figures

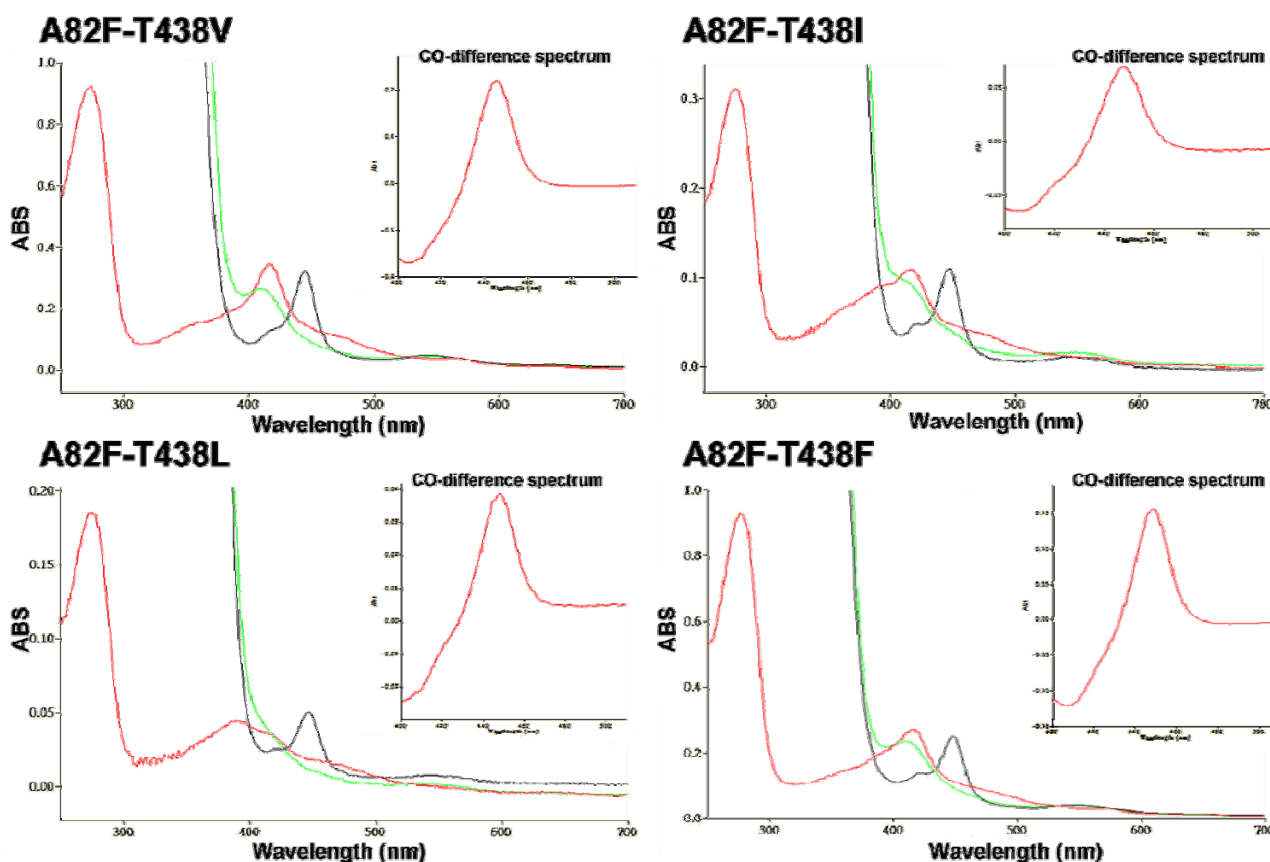

**Figure S1** UV-Visible absorption spectra of purified P450 BM3 A82F-T438(V/I/L/F) mutants of 'resting' enzymes (red lines), enzymes reduced by sodium dithionite (green lines) and the reduced form CO-bound spectra (black lines). The CO-difference spectra were shown in insets for each mutant.

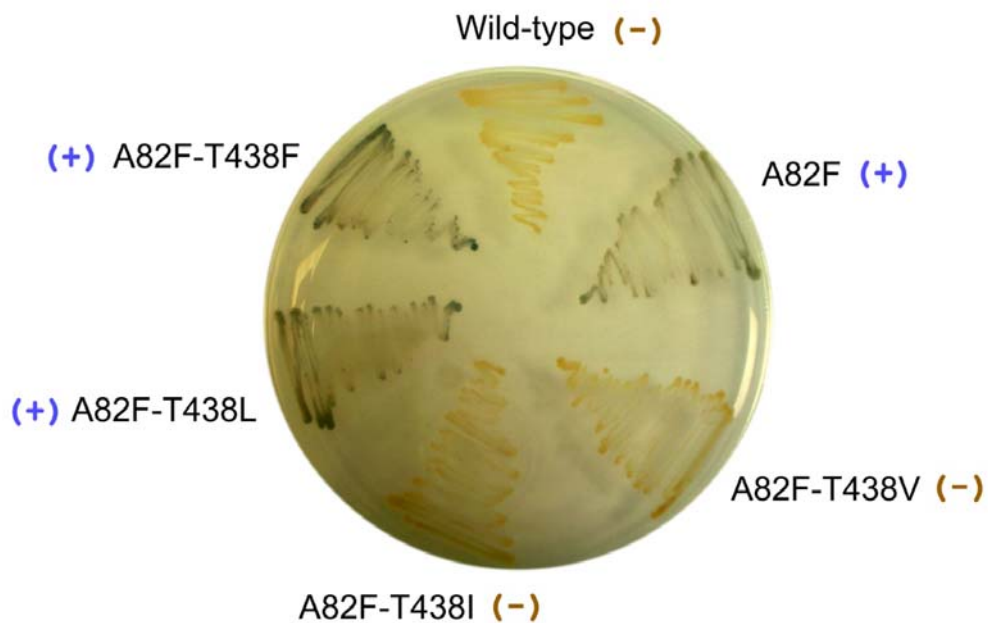

**Figure S2** Phenotypes of *E. coli* JM109 cells containing P450 BM3 A82F-T438V, A82F-T438I, A82F-T438L, and A82F-T438F mutant genes streaked on a LB-Amp agar plate. Wild-type, A82F-T438V and A82F-T438I present a normal *E. coli* phenotype colour; on the other hand, A82F, A82F-T438L and A82F-T438F transform the phenotype of *E. coli* cell to blue colour, reflecting the formation of indigo.

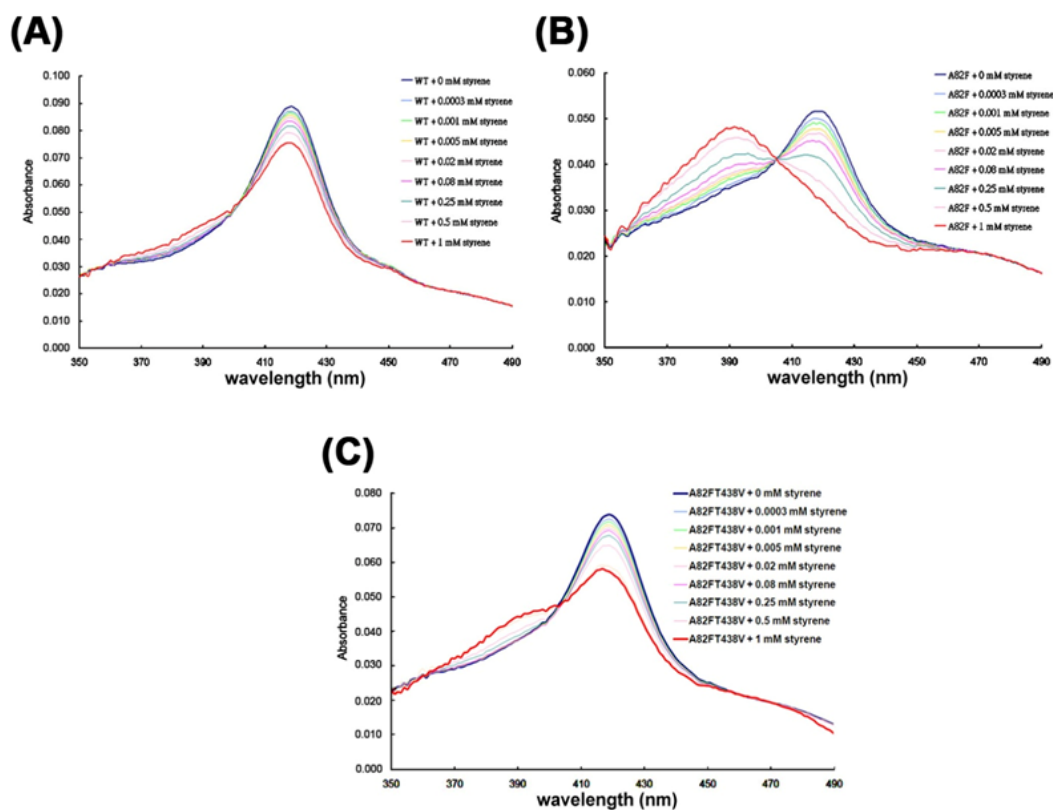

**Figure S3** Optical titration of styrene binding to (A) wild-type P450 BM3, (B) A82F mutant, and (C) A82F-T438V mutant.

5

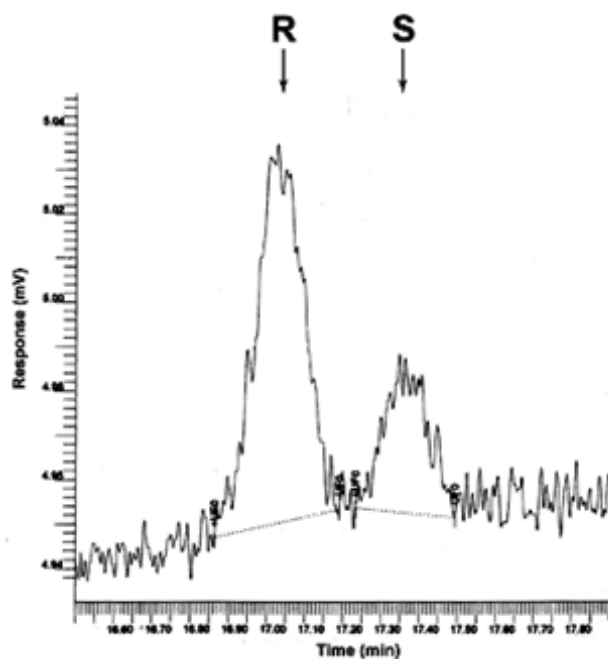

**Figure S4** GC chromatograms of the products of styrene epoxidation by P450 BM3 mutants. Samples were petroleum ether extracts of reaction mixtures containing 800  $\mu$ M styrene, 300  $\mu$ M NADPH and 1  $\mu$ M P450 BM3 A82F-T438L mutant
